# Supplementary material for: Nucleic acid extraction from formalin-fixed paraffin-embedded cancer cell line samples: a trade off between quantity and quality?
Source: Springer Nature journal article supplement (doi:10.1186/s12907-016-0039-3), 2016-11-14

1a. Qiagen AllPrep DNA/RNA FFPE

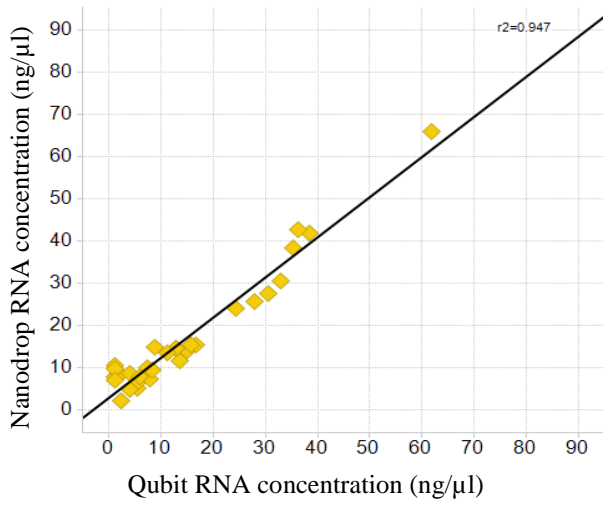

1b. Qiagen RNeasy FFPE Kit

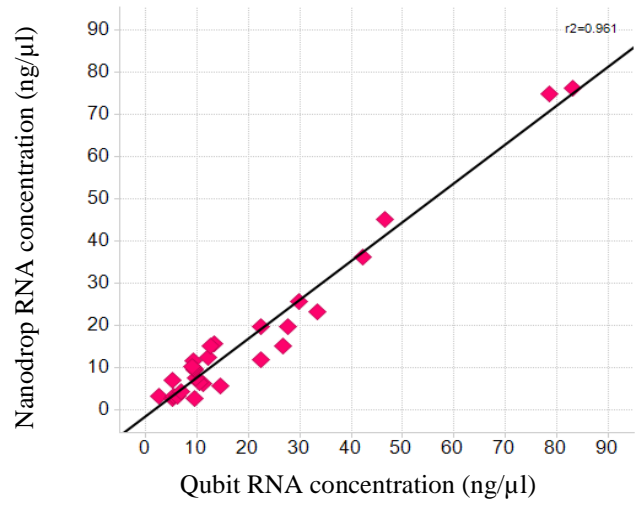

1c. Arcturus paradise plus FFPE RNA isolation kit

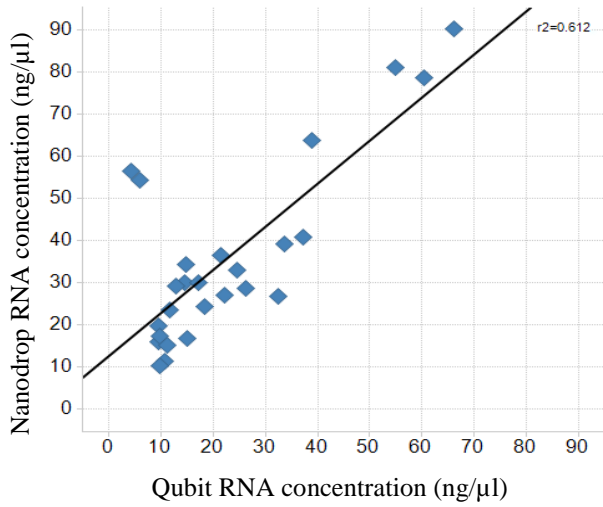

1d. Maxwell 16 LEV RNA FFPE Purification kit

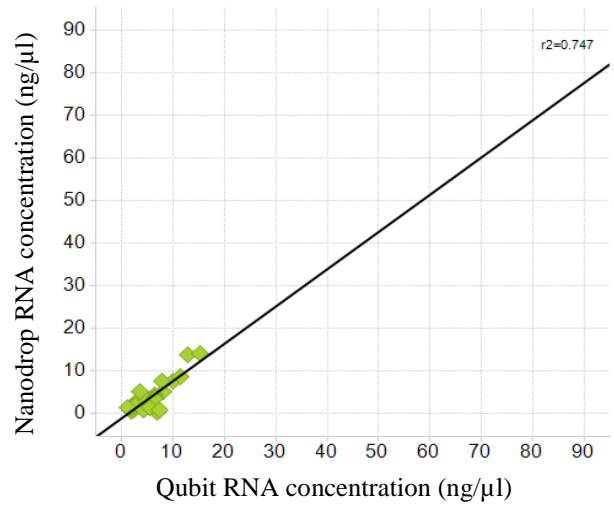

Supplement: MOESM2 [file 11044740]
