# Supplementary material for: Nucleic acid extraction from formalin-fixed paraffin-embedded cancer cell line samples: a trade off between quantity and quality?
Source: Springer Nature journal article supplement (doi:10.1186/s12907-016-0039-3), 2016-11-14
Supplement: MOESM5 [file 11044740]

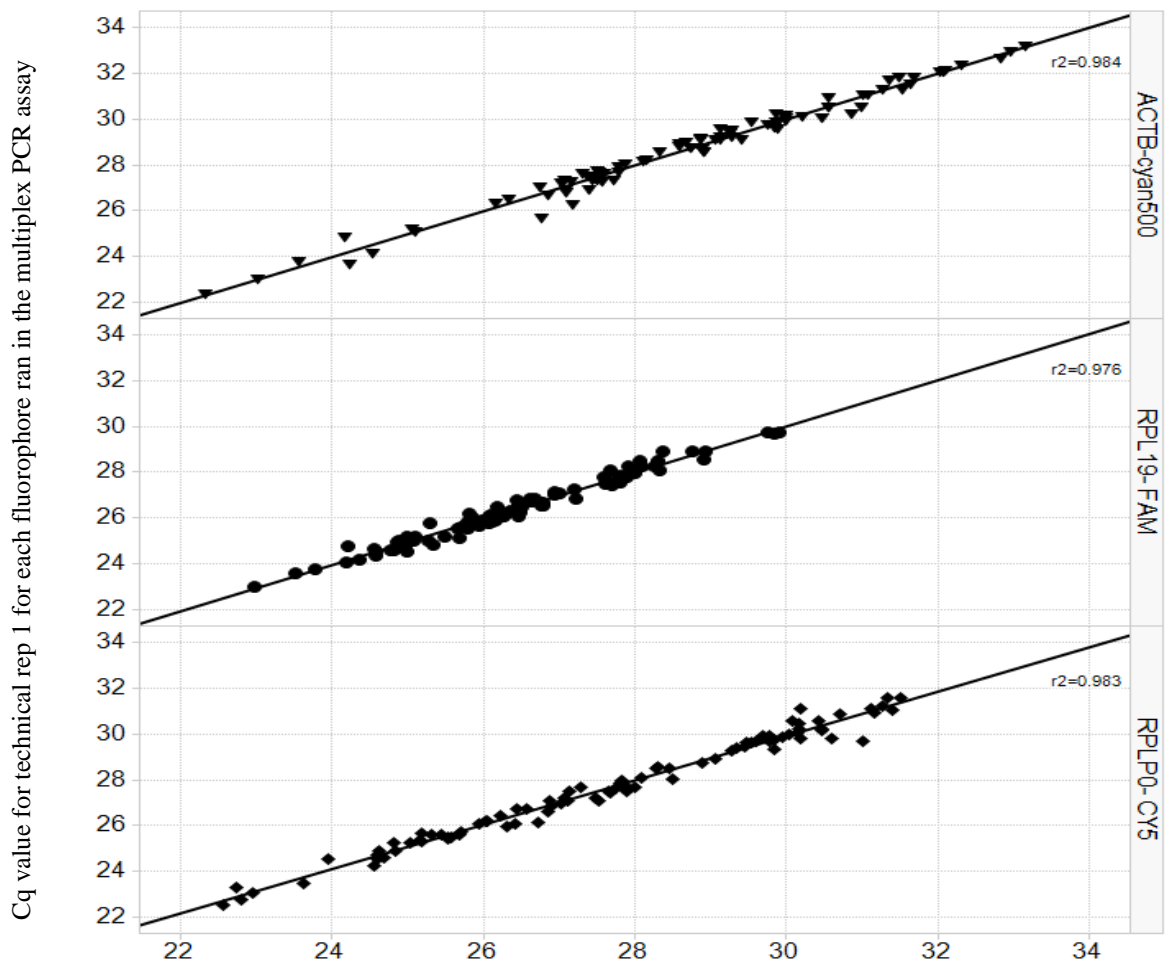

Cq value for technical rep 2 for each fluorophore ran in the multiplex PCR assay
