# Supplementary material for: Nucleic acid extraction from formalin-fixed paraffin-embedded cancer cell line samples: a trade off between quantity and quality?
Source: Springer Nature journal article supplement (doi:10.1186/s12907-016-0039-3), 2016-11-14
Supplement: MOESM6 [file 11044740]

**Supplemental Table S1.** Properties of the three primers and probes used in the in house multiplex PCR assay to assess RNA quality. Roche LightCycler480 PCR machine conditions:

1 pre incubation cycle at 95°C for 10 minutes followed by 45 amplification cycles at 95°C for 10 seconds, 60°C for 30 seconds, 72°C for 1 second before cooling to 40°C for 30 seconds.

|                               |                                           |                                           |                                           |
|-------------------------------|-------------------------------------------|-------------------------------------------|-------------------------------------------|
| Target Gene Symbol            | RPLP0                                     | RPL19                                     | ACTB                                      |
| Sequence accession number     | NM_001002                                 | NM_000981                                 | NM_001101                                 |
| Amplicon Length (base pairs)  | Chromosome 12                             | Chromosome 17                             | Chromosome 7                              |
| Amplicon Length               | 144bp                                     | 68bp                                      | 137bp                                     |
| Primer Location               | Exon 2 and 3<br>394 – 537 bases           | Exon 3, 4<br>418 – 485 bases              | Exon 1,2,3,4,5<br>855 - 991 bases         |
| Splice Variants Targeted      | Transcript 1, 2, 4                        | Transcript 1,2,3                          | Transcript 1,2,3,4,7,8,9                  |
| Forwards Primer Sequence 5'3' | AATGTTTCAT<br>TGTGGGAGCA                  | AGGAGAATGA<br>GGATTTTGCG                  | TGGACTTCG<br>AGCAAGAGTG                   |
| Reverse Primer Sequence 5'3'  | CTGGGTTGT<br>TTCCAGGTG                    | ATGTGGCGA<br>TCGATCTTCTT                  | GAAGGAAGGC<br>TGGAAGAGGTG                 |
| Probe Sequence 5'3'           | CTTCGCGGG<br>AAGGCTCTGGT                  | CCGGCTGCTCA<br>GAAGATACCGTG               | CGGCTGCTTC<br>CAGCTCCTCC                  |
| Modifications                 | 5' Cy5 3' BHQ-2                           | 5' 6-FAM 3' BHQ-1                         | 5' Cyan500 3' BHQ-2                       |
| Final Primer Concentration    | 10µM                                      | 10µM                                      | 10µM                                      |
| Final Probe Concentration     | 5µM                                       | 5µM                                       | 5µM                                       |
| Purification Method           | Primers: RP Cartridge,<br>Probe: RPL HCLC | Primers: RP Cartridge,<br>Probe: RPL HCLC | Primers: RP Cartridge,<br>Probe: RPL HCLC |
